# Supplementary material for: The complete genome assembly of Nicotiana benthamiana reveals genetic and epigenetic landscape of centromeres
Source: Research Square preprint supplement (doi:10.21203/rs.3.rs-4568898/v1), 2024-08-02
Supplement: Supplementary file 1 [file 9f31be7be78df9d4ffa69b00.xlsx]

## Sheet: Legend
Supplementary Tables
Supplementary Table 1. Statistics of genome and transcriptome sequencing data in this project
Supplementary Table 2. Global statistics for the publicly available N. benthamiana LAB strain genome assemblies
Supplementary Table 3. Chromosome names in different N. benthamiana genome assemblies
Supplementary Table 4. The final repeat annotation of whole genome and centromeres in this study
Supplementary Table 5. The gaps of HiFi assembly were closed in the final T2T assembly
Supplementary Table 6. The positions of CENH3 identified centromeres (CE) and centromeric satellites (Csate)
Supplementary Table 7. The classification of centromeres based on sequence compositions
Supplementary Table 8. Position of centromeric intact LTR/Gypsy retrotransposons
Supplementary Table 9. Number of intact and truncated Ty3/Gypsy elements in centromere regions
Supplementary Table 10. Chromosomal localization of nuclear chloroplast and mitochondrial DNA segments
Supplementary Table 11. Homoeolog gene numbers present on pairwise chromosomes
Supplementary Table 12. Non-redundant protein sequences used in the phylogenetic tree

## Sheet: S1
Supplementary Table 1. Statistics of genome and transcriptome sequencing data in this project
	Sample	Total reads	Total bases	Avg length	N50 length	Coverage #	Mapping rate
Genome sequencing
HiFi	Leaf	18711197	332643938897	17778	17916	116.7	0.999
HiFi (>20 kb)		4781986	118794939548	24842	24341	41.7	-
ONT	Leaf	1764854	136517325492	77353	91992	47.9	0.9993
ONT (>100kb)		422288	52800397156	125194	134400	18.5	-
Illumina NGS	Leaf	2655604372	397665170402	150	150	139.5	0.9953
Hi-C	Leaf	2960052812	442278620512	150	150	155.2	-
Transcriptome sequencing
RNA-seq	Root	21854207	6542274722	150	150	-	0.9497
RNA-seq	Stem	20725253	6206274884	150	150	-	0.9739
RNA-seq	Leaf	23595138	7066605828	150	150	-	0.9732
RNA-seq	Flower	21081431	6311694024	150	150	-	0.9687
RNA-seq	Seeds	21268379	6368960584	150	150	-	0.9714
Iso-Seq $	Root	543169	1214982061	2913	2236	-	-
Iso-Seq	Stem	545890	1100429864	2670	2015	-	-
Iso-Seq	Leaf	417788	771151924	2342	1845	-	-
Iso-Seq	Flower	474274	1002830914	2819	2114	-	-
Iso-Seq	Seeds	449492	1082058525	2974	2407	-	-
# The coverage was calculated using an estimated genome size of 2.85 Gb for N.benthamiana
$ The statistics of Iso-Seq data were counted from CCS (circular consensus sequencing) reads

## Sheet: S2
Supplementary Table 2. Global statistics for the publicly available N. benthamiana LAB strain genome assemblies
	Parameter	Niben v2.6.1	NB.NP [ref.15]	NB.PCP [ref.18]	NB.CELL [ref.19]	NB.MP [ref.20]	This study
Sequencing	Release year	2019	2023	2023	2023	2024	2024
	ONT	-	7 ×	-	-	-	41 ×
	CLR	10 ×	57 ×	-	-	-	-
	HiFi	-	-	48 ×	40 ×	37 ×	117 ×
	NGS	> 150 ×	70 ×	16 ×	-	-	120 ×
	Hi-C	> 60 ×	47 ×	-	110 ×	135 ×	107 ×
	Bionano	-	-	-	-	-	330 ×
Contig assembly	Contig Number	224953	10321	1901	353	3091	19
	Contig N50 / bp	35333	1946713	31273564	54211578	51453396	146412814
	Contig N90 / bp	1176	518066	7162200	17074095	11693992	135007592
	Longest contig / bp	2838176	11197799	100797700	124829910	126883724	188513114
	Contig size / bp	2751073856	2806204289	2926018961	2849598328	2928577395	2849299002
	GC content	0.3803	0.3779	0.3812	0.3809	0.3806	0.3808
Scaffold assembly	Scaffold number	17639	20	1668	305	2831	19
	Scaffold N50 / bp	151625522	141867802	141754421	139975305	143236525	146412814
	Scaffold N90 / bp	137820123	129979819	110643690	130104658	132099500	135007592
	Longest scaffold / bp	194605305	182027195	184452736	182992192	183487978	188513114
	Scaffold size / bp	3035611412	2835009602	2926135461	2849622328	2928707395	2849299002
Re-scaffold	Placed contigs	182412	2814	456	96	525	-
(RagTag)	Scaffold N50 / bp	139866871	141970203	144124235	144704918	144735590	-
	Scaffold N90 / bp	127942533	130893637	133757834	134989243	134977961	-
	Longest scaffold / bp	181589431	181668275	186034922	185998836	185326980	-
	Anchored size / bp	2701124648	2760742621	2834469322	2835232349	2830323886	-
	Anchoring rate	0.9818	0.9837	0.9593	0.9949	0.96645	-
	Gap number	+++	++	437	77	506	0
Quality assessment	Telomere number	0	1	3	24	29	38
	LAI	9.26	17.85	17.8	17.84	18.03	17.84
	QV	29.4	33	60.23	60.22	-	69.65
	Assembly BUSCO	0.986	0.985	0.988	0.988	0.988	0.988
	BUSCO [S]	0.338	0.343	0.33	0.329	0.329	0.329
	BUSCO [D]	0.648	0.642	0.658	0.659	0.659	0.659
	BUSCO [F]	0.001	0.001	0.001	0.001	0.001	0.001
	BUSCO [M]	0.013	0.014	0.011	0.011	0.011	0.011
Repeat composition	Total Repeat	0.692	0.7663	0.7801	0.7804	0.7609	0.7812
(RepeatMasker)	LINEs	0.0357	0.0372	0.0371	0.037	0.0359	0.0369
	SINEs	0.0021	0.0022	0.0021	0.0021	0.002	0.0021
	LTR/Copia	0.1139	0.1661	0.1654	0.1654	0.1609	0.1647
	LTR/Gypsy	0.4168	0.4261	0.4258	0.4255	0.4124	0.424
	LTR/others	0.004	0.0064	0.0072	0.0073	0.0072	0.0073
	DNA transposons	0.0495	0.0525	0.0524	0.0524	0.0508	0.0522
	Satellites	0.0001	0.0001	0.0001	0.0001	0.0093	0.0001
	Small RNA	0.0028	0.0026	0.01	0.0101	0.0127	0.0136
	Simple repeats	0.005	0.0052	0.0056	0.0056	0.0056	0.0057
	Unclassified	0.0601	0.0662	0.0724	0.0728	0.062	0.0726
Gene annotation	Number of coding genes	61328	45797	57583	49094	66918	57023
	Multi exon gene models	58019	-	42167	42340	51036	44651
	Average gene length / bp	4594	-	3924	4825	3689	4711					-
	Average transcript length / bp	1002	-	1062	1276	1225	1061					-
	Exons/gene model	4.98	5.64	4.54	5.42	4.59	4.87

## Sheet: S3
Supplementary Table 3. Chromosome names in different N. benthamiana genome assemblies
NB.T2T#	Niben v2.6.1$	NB.NP [ref.15]	NB.PCP [ref.18]	NB.MP [ref.20]
Chr01	+ Niben261Chr01	- NbLAB360C15	+ Nbe.v1.s00190	- Chr13
			+ Nbe.v1.s00210
Chr02	+ Niben261Chr02	+ NbLAB360C08	+ Nbe.v1.s00080	- Chr15
Chr03	+ Niben261Chr03	- NbLAB360C17	+ Nbe.v1.s00010	- Chr12
Chr04	+ Niben261Chr04	- NbLAB360C16	- Nbe.v1.s00180	+ Chr19
			- Nbe.v1.s00200
Chr05	+ Niben261Chr05	- NbLAB360C14	+ Nbe.v1.s00140	- Chr08
Chr06	+ Niben261Chr06	- NbLAB360C13	- Nbe.v1.s00120	- Chr06
Chr07	+ Niben261Chr07	+ NbLAB360C02	- Nbe.v1.s00090	+ Chr03
Chr08	+ Niben261Chr08	- NbLAB360C03	- Nbe.v1.s00150	- Chr05
Chr09	+ Niben261Chr09	- NbLAB360C01	+ Nbe.v1.s00160	- Chr01
Chr10	+ Niben261Chr10	- NbLAB360C11	+ Nbe.v1.s00170	+ Chr02
Chr11	+ Niben261Chr11	- NbLAB360C04	+ Nbe.v1.s00130	- Chr07
Chr12	+ Niben261Chr12	+ NbLAB360C05	+ Nbe.v1.s00030	+ Chr14
Chr13	+ Niben261Chr13	- NbLAB360C09	+ Nbe.v1.s00040	+ Chr10
Chr14	+ Niben261Chr14	+ NbLAB360C10	+ Nbe.v1.s00050	+ Chr09
Chr15	+ Niben261Chr15	- NbLAB360C12	+ Nbe.v1.s00070	- Chr04
Chr16	+ Niben261Chr16	+ NbLAB360C19	- Nbe.v1.s00060	- Chr18
Chr17	+ Niben261Chr17	+ NbLAB360C06	- Nbe.v1.s00020	- Chr17
Chr18	+ Niben261Chr18	+ NbLAB360C07	- Nbe.v1.s00100	- Chr11
Chr19	+ Niben261Chr19	- NbLAB360C18	+ Nbe.v1.s00110	+ Chr16
# chromosome numbers were ordered according to previous Niben v2.6.1 version
$ + means same orentiation; - means reverse complement

## Sheet: S4
Supplementary Table 4. The final repeat annotation of whole genome and centromeres in this study
	Length / Mb			Proportion / %
	Whole genome	Centromeres		Whole genome	Centromeres
Total size	2849.3	38.64		100	100
Total Repeat	2247.33	35.03		78.87	92.84
LINEs	105.09	0.37		3.69	0.97
SINEs	6.01	0.02		0.21	0.05
LTR/Copia	469.34	2.56		16.47	6.62
LTR/Gypsy	1207.97	7.94		42.4	20.54
LTR/Caulimovirus	19.76	0.51		0.69	1.32
LTR/others	1.21	0.01		0.04	0.02
DNA transposons	148.73	0.56		5.22	1.45
Satellites (<50 bp)	30.26	21.34		1.06	55.23
Satellites (>50 bp)	31.02	0.58		1.09	1.5
5S rDNA	8.71	0		0.31	0
45S rDNA	13.98	0		0.49	0
Simple repeats	16.25	0.16		0.57	0.41
Unclassified	180.33	0.98		6.33	2.53
NUPTs	1.23	0		0.04	0
NUMTs	7.44	0.85		0.26	2.2

## Sheet: S5
Supplementary Table 5. The gaps of HiFi assembly were closed in the final T2T assembly
Type	Position	Start	End	Length / bp	Feature
	Chr01	115661680	115706003	-44323	overlap
	Chr03	105660890	105687527	-26637	overlap
	Chr06	99304245	99383318	-79073	overlap
	Chr12	64735199	64804561	-69362	overlap	NUPTs
	Chr12	146967269	147006830	-39561	overlap
	Chr17	92736399	92778591	-42192	overlap
	Chr18	94925630	94965732	-40102	overlap
	Chr01	52881404	52885057	3653	GA-rich	(GA)n
	Chr02	49306642	49307380	738	GA-rich	(GA)n
	Chr02	83102044	83115181	13137	GA-rich	(GA)n
	Chr03	57154320	57156785	2465	GA-rich	(CT)n
	Chr03	79700670	79701687	1017	GA-rich	(GAA)n
	Chr03	107702318	110097988	2395670	SD
	Chr04	23668981	23669116	135	GA-rich	(CTT)n
	Chr06	161664	2927317	2765653	NOR
	Chr06	116001237	116043340	42103	Unkonwn
	Chr07	24323328	24324352	1024	GA-rich	(CT)n
	Chr07	69157475	69157622	147	GA-rich	(CT)n
	Chr08	30708139	30708745	606	GA-rich	(CT)n
	Chr10	26790860	26791414	554	GA-rich	(GA)n
	Chr12	94556032	94556641	609	GA-rich	(GA)n
	Chr14	5756789	5757290	501	GA-rich	(GA)n
	Chr14	61173429	61174789	1360	GA-rich	(CTT)n
	Chr15	23833777	23834144	367	GA-rich	(GA)n
	Chr16	103052321	103054569	2248	GA-rich	(GA)n
	Chr17	105868524	105870019	1495	GA-rich	(CTT)n
	Chr18	1949721	1950742	1021	GA-rich	(CTT)n
	Chr19	2223461	11384591	9161130	NOR

## Sheet: S6
Supplementary Table 6. The positions of CENH3 identified centromeres (CE) and centromric satellites (Csate)
Chr_id	Length	CE_start	CE_end	CE_size / Mb	Csate_start	Csate_end	Csate_size / Mb	GC / %	q/p ratio	Karotype
Chr01	182634243	120030000	121980000	1.95	120908000	121790000	0.88	46.91	1.98	sm
Chr02	144004072	15840000	16710000	0.87	-	-	0	35.11	8.04	t
Chr03	188513114	176910000	180180000	3.27	177569000	179617000	2.05	51.58	21.23	t
Chr04	185356503	118920000	123960000	5.04	118920000	123917000	5	57.55	1.94	sm
Chr05	135007592	120630000	123510000	2.88	120728000	122397000	1.67	56.57	9.64	t
Chr06	146752514	18360000	18660000	0.3	-	-	0	40.95	6.98	st
Chr07	144166824	6180000	6780000	0.6	-	-	0	37.79	22.23	t
Chr08	133833317	119760000	122100000	2.34	119864000	122066000	2.2	56.8	10.21	t
Chr09	132160607	11460000	12660000	1.2	11673000	12599000	0.93	47.93	10.43	t
Chr10	136732836	122430000	127170000	4.74	122430000	124899000	2.47	49.81	12.8	t
Chr11	137446995	14370000	14850000	0.48	-	-	0	39.71	8.53	t
Chr12	150654561	139260000	139650000	0.39	-	-	0	38.94	12.65	t
Chr13	145912061	139380000	139800000	0.42	-	-	0	38.47	22.8	t
Chr14	146412814	11850000	16530000	4.68	13305000	15020000	1.72	48.54	9.77	t
Chr15	148654966	14550000	15030000	0.48	-	-	0	38.75	9.18	t
Chr16	144743856	135240000	138450000	3.21	135272000	138355000	3.08	57.73	21.49	t
Chr17	150496301	12180000	16230000	4.05	12560000	16211000	3.65	56.27	11.02	t
Chr18	144541690	105180000	106290000	1.11	105420000	105976000	0.56	47.12	2.75	sm
Chr19	151274136	34200000	34830000	0.63	-	-	0	38.89	3.4	st

## Sheet: S7
Supplementary Table 7. The classification of centromeres based on sequence compositions
Type	Feature	SubA genome	SubB genome
1. Gypsy-type		CEN06	CEN07 (mt)
		CEN15	CEN11 (mt)
		CEN19	CEN12 (mt)
			CEN13 (mt)
2. Satellite-type		CEN16	CEN04 (mt)
		CEN17 (mt)	CEN08 (mt)
Combined-type		CEN01 (mt)	CEN10 (mt)
		CEN05	CEN14
Merged-type		CEN09	CEN03 (mt)
		CEN18
3. NUMTs-type			CEN02 (mt)
(mt) means the NUMTs inserted in the centromeric and pericentromeric regions.

## Sheet: S8
Supplementary Table 8. Position of centromeric intact LTR/Gypsy retrotransposons
Chr	Start	End	Family	Clade	Strand	Insertion time (Mya)
Chr09	12417229	12423440	LTR/Gypsy	Galadriel	-	0
Chr09	12476678	12482889	LTR/Gypsy	Galadriel	-	0
Chr17	13286881	13290505	LTR/Gypsy	Galadriel	+	0
Chr18	105486107	105490194	LTR/Gypsy	Galadriel	-	0.081
Chr17	15653936	15659843	LTR/Gypsy	Galadriel	-	0.12
Chr16	136768232	136773934	LTR/Gypsy	Galadriel	+	0.156
Chr18	105508341	105512406	LTR/Gypsy	Galadriel	-	0.165
Chr03	178937462	178943610	LTR/Gypsy	CRM	+	0.17
Chr16	135552276	135558512	LTR/Gypsy	Galadriel	+	0.182
Chr14	13944092	13948759	LTR/Gypsy	Galadriel	-	0.188
Chr17	15586971	15591093	LTR/Gypsy	Galadriel	+	0.188
Chr14	14224056	14229716	LTR/Gypsy	Galadriel	-	0.234
Chr16	136540504	136546197	LTR/Gypsy	Galadriel	-	0.234
Chr17	16120888	16126592	LTR/Gypsy	Galadriel	+	0.234
Chr05	121025560	121031468	LTR/Gypsy	Galadriel	-	0.241
Chr17	13370673	13376393	LTR/Gypsy	Galadriel	+	0.281
Chr09	12066047	12069889	LTR/Gypsy	Galadriel	-	0.296
Chr05	121716801	121721456	LTR/Gypsy	Galadriel	-	0.316
Chr03	178823606	178828158	LTR/Gypsy	Galadriel	+	0.33
Chr04	122573595	122578266	LTR/Gypsy	Galadriel	-	0.346
Chr16	135623808	135627918	LTR/Gypsy	Galadriel	+	0.351
Chr17	15728243	15734172	LTR/Gypsy	Galadriel	+	0.351
Chr04	123163135	123168953	LTR/Gypsy	Galadriel	+	0.387
Chr14	13397925	13403633	LTR/Gypsy	Galadriel	-	0.39
Chr10	123692862	123699360	LTR/Gypsy	Galadriel	-	0.398
Chr10	123903193	123908960	LTR/Gypsy	Galadriel	-	0.407
Chr17	13618784	13623211	LTR/Gypsy	Galadriel	-	0.438
Chr18	105697383	105701491	LTR/Gypsy	Galadriel	-	0.459
Chr17	14493265	14497848	LTR/Gypsy	Galadriel	-	0.463
Chr09	11734606	11738003	LTR/Gypsy	Galadriel	-	0.485
Chr17	13925730	13928910	LTR/Gypsy	Galadriel	+	0.499
Chr05	121133978	121139848	LTR/Gypsy	Galadriel	-	0.5
Chr04	119605163	119609808	LTR/Gypsy	Galadriel	+	0.511
Chr10	123141046	123144441	LTR/Gypsy	Galadriel	-	0.556
Chr10	122767422	122770591	LTR/Gypsy	Galadriel	+	0.62
Chr03	178344801	178351000	LTR/Gypsy	Galadriel	-	0.627
Chr01	121678667	121681842	LTR/Gypsy	Galadriel	+	0.657
Chr16	138299299	138302804	LTR/Gypsy	Galadriel	+	0.676
Chr04	122239603	122246112	LTR/Gypsy	CRM	-	0.69
Chr14	14439177	14444877	LTR/Gypsy	Galadriel	-	0.717
Chr17	14325893	14329560	LTR/Gypsy	Galadriel	-	0.724
Chr16	136066966	136070684	LTR/Gypsy	Galadriel	+	0.727
Chr05	122395540	122402038	LTR/Gypsy	CRM	+	0.729
Chr04	123171345	123177833	LTR/Gypsy	CRM	-	0.73
Chr18	105912999	105923383	LTR/Gypsy	Galadriel	-	0.818
Chr09	11921480	11925201	LTR/Gypsy	Galadriel	-	0.886
Chr16	138224316	138230016	LTR/Gypsy	Galadriel	-	0.938
Chr05	120738411	120744325	LTR/Gypsy	Galadriel	-	0.979
Chr16	136651363	136657410	LTR/Gypsy	CRM	+	0.984
Chr10	124792521	124798216	LTR/Gypsy	Galadriel	-	1.011
Chr04	123243375	123249902	LTR/Gypsy	CRM	+	1.021
Chr04	122211717	122217712	LTR/Gypsy	CRM	+	1.035
Chr16	136010885	136015198	LTR/Gypsy	Galadriel	+	1.243
Chr01	120505358	120508934	LTR/Gypsy	Galadriel	-	1.297
Chr14	14697028	14702714	LTR/Gypsy	Galadriel	-	1.304
Chr04	122734116	122741020	LTR/Gypsy	Galadriel	+	1.432
Chr03	179220651	179226351	LTR/Gypsy	Galadriel	-	1.434
Chr09	12572589	12576293	LTR/Gypsy	Galadriel	-	1.467
Chr09	12460039	12463641	LTR/Gypsy	Galadriel	-	1.542
Chr04	122776383	122783287	LTR/Gypsy	Galadriel	+	1.545
Chr10	123569091	123572443	LTR/Gypsy	Galadriel	+	1.632
Chr01	121244596	121250269	LTR/Gypsy	Galadriel	-	1.638
Chr09	11659663	11663137	LTR/Gypsy	Galadriel	-	1.72
Chr09	12284005	12287639	LTR/Gypsy	Galadriel	-	1.811
Chr10	124969211	124975391	LTR/Gypsy	Galadriel	+	1.846
Chr16	135962366	135965794	LTR/Gypsy	Galadriel	+	1.977
Chr09	11585730	11592476	LTR/Gypsy	CRM	+	2.055
Chr14	12001652	12006556	LTR/Gypsy	Galadriel	-	2.283
Chr17	12633776	12638684	LTR/Gypsy	Galadriel	-	2.311
Chr14	14313353	14316875	LTR/Gypsy	Galadriel	-	2.771
Chr17	12578031	12582917	LTR/Gypsy	Galadriel	-	2.937
Chr09	12353889	12358418	LTR/Gypsy	Galadriel	+	3.008
Chr14	11910531	11915606	LTR/Gypsy	Galadriel	-	3.278

## Sheet: S9
Supplementary Table 9. Number of intact and truncated Ty3/Gypsy elements in centromere regions
	Type	Satellite	Gypsy length	Intact & Truncted Gypsy elements							Intact Gypsy elements
				Athila	CRM	Galadriel	Ogre	Tekay	Retand		Athila	CRM	Galadriel	Ogre	Tekay	Retand
CEN04	Satellite	Yes	374467		11	35	2					4	4
CEN08	Satellite	Yes	64825		1	21							2
CEN16	Satellite	Yes	295138		6	32	1	1	1			1	9
CEN17	Satellite	Yes	344534	2	1	53	3	8	1				12
CEN03	Merged	Yes	513284	3	8	12	8	10	5			1	3
CEN09	Merged	Yes	276940	4	7	31	5	11	2			1	10
CEN18	Merged	Yes	411416	1		12	10	15	6				4
CEN01	Combined	Yes	422081	4	1	14	3	18	4				3
CEN05	Combined	Yes	659495	2	3	15	1	4	1			1	5
CEN10	Combined	Yes	1195319	6	4	30	28	53	14				7
CEN14	Combined	Yes	1380731	12	1	52	47	45	33				8
CEN02	NUMTs	No	118399				1	6	5
CEN06	Gypsy	No	198540	1			1	30
CEN07	Gypsy	No	431525	2			20	7	3
CEN11	Gypsy	No	355201				4	70	1
CEN12	Gypsy	No	266490	2			11	9
CEN13	Gypsy	No	335719	2			13	10	1
CEN15	Gypsy	No	281507		1		4	11	5
CEN19	Gypsy	No	378147	4		1	10	24	7
Total				45	44	308	172	332	89			8	67

[truncated: 3 more sheets: S10, S11, S12]
